# Supplementary material for: mTORC1 and mTORC2 differentially promote natural killer cell development
Source: eLife. 2018 May 29;7:e35619. doi: 10.7554/eLife.35619 (PMC5976438; doi:10.7554/eLife.35619)
Supplement: Figure 5—source data 1. — This is related to Figure 5D. [file elife-35619-fig5-data1.xlsx]

## Sheet: Table S3
Figure 5-Source Data 1. Differentially expressed genes that belong to eIFs, eEFs and ribosome protein families in Rptor cKO NK cells.
ENSGID	GeneName	P_cKO_vs_P_WT.L2FC	P_cKO_vs_P_WT.padj	P_cKO_vs_P_WT.FCpattern	P_cKO_vs_P_WT.FDR005
ENSMUSG00000037742	Eef1a1	0.364135	1.90005e-06	U	Y
ENSMUSG00000025967	Eef1b2	0.319404	9.87758e-05	U	Y
ENSMUSG00000071644	Eef1g	0.206316	0.0364888	U	Y
ENSMUSG00000034994	Eef2	0.290745	0.00397695	U	Y
ENSMUSG00000022544	Eef2kmt	0.306273	0.0475675	U	Y
ENSMUSG00000035530	Eif1	0.293889	0.000282006	U	Y
ENSMUSG00000029613	Eif2ak1	-0.317984	0.00270393	D	Y
ENSMUSG00000005102	Eif2ak4	0.4079	0.00227265	U	Y
ENSMUSG00000021116	Eif2s1	-0.304476	0.0340729	D	Y
ENSMUSG00000035150	Eif2s3x	-0.416097	0.00985632	D	Y
ENSMUSG00000069049	Eif2s3y	0.259965	7.23461e-06	U	Y
ENSMUSG00000056076	Eif3b	-0.27278	0.00553185	D	Y
ENSMUSG00000030738	Eif3c	-0.243071	0.00391441	D	Y
ENSMUSG00000016554	Eif3d	-0.227963	0.0163796	D	Y
ENSMUSG00000022336	Eif3e	0.367905	5.91994e-06	U	Y
ENSMUSG00000033047	Eif3l	-0.256267	0.0109048	D	Y
ENSMUSG00000022884	Eif4a2	0.497965	7.18511e-05	U	Y
ENSMUSG00000025580	Eif4a3	-0.306121	0.00759283	D	Y
ENSMUSG00000040731	Eif4h	-0.184663	0.0458399	D	Y
ENSMUSG00000021282	Eif5	0.360097	0.0161983	U	Y
ENSMUSG00000050192	Eif5a2	0.456293	0.0406231	U	Y
ENSMUSG00000027613	Eif6	-0.281458	0.02176	D	Y
ENSMUSG00000008682	Rpl10	0.28415	0.00240545	U	Y
ENSMUSG00000084416	Rpl10a-ps1	0.337698	0.00383355	U	Y
ENSMUSG00000038900	Rpl12	0.490183	7.1649e-05	U	Y
ENSMUSG00000000740	Rpl13	0.35002	0.000766801	U	Y
ENSMUSG00000074129	Rpl13a	0.363596	8.80037e-07	U	Y
ENSMUSG00000025794	Rpl14	0.26584	0.00311444	U	Y
ENSMUSG00000062328	Rpl17	0.524582	1.44488e-12	U	Y
ENSMUSG00000045128	Rpl18a	0.500794	1.14884e-08	U	Y
ENSMUSG00000017404	Rpl19	0.357133	0.000176205	U	Y
ENSMUSG00000041453	Rpl21	0.324797	0.000124947	U	Y
ENSMUSG00000028936	Rpl22	0.312997	0.001258	U	Y
ENSMUSG00000071415	Rpl23	0.436752	5.08221e-06	U	Y
ENSMUSG00000058546	Rpl23a	0.356939	7.2022e-06	U	Y
ENSMUSG00000098274	Rpl24	0.194337	0.0269022	U	Y
ENSMUSG00000060938	Rpl26	0.268816	0.0119564	U	Y
ENSMUSG00000060036	Rpl3	0.317333	4.36708e-05	U	Y
ENSMUSG00000058600	Rpl30	0.553013	2.7789e-12	U	Y
ENSMUSG00000057841	Rpl32	0.309382	6.86309e-05	U	Y
ENSMUSG00000062006	Rpl34	0.263969	0.00680688	U	Y
ENSMUSG00000060636	Rpl35a	0.282125	0.00355593	U	Y
ENSMUSG00000079435	Rpl36a	0.380079	0.00185887	U	Y
ENSMUSG00000046330	Rpl37a	0.205271	0.0432701	U	Y
ENSMUSG00000057322	Rpl38	0.255509	0.00740576	U	Y
ENSMUSG00000079641	Rpl39	0.234443	0.0189267	U	Y
ENSMUSG00000032399	Rpl4	0.368886	2.16402e-06	U	Y
ENSMUSG00000093674	Rpl41	-0.217893	0.0215077	D	Y
ENSMUSG00000029614	Rpl6	0.249183	0.00574012	U	Y
ENSMUSG00000043716	Rpl7	0.265019	0.00271192	U	Y
ENSMUSG00000063888	Rpl7l1	-0.331923	0.0105161	D	Y
ENSMUSG00000003970	Rpl8	0.230498	0.0076391	U	Y
ENSMUSG00000047215	Rpl9	0.31168	0.000130577	U	Y
ENSMUSG00000067274	Rplp0	0.273936	0.00100972	U	Y
ENSMUSG00000025508	Rplp2	0.41539	1.57442e-08	U	Y
ENSMUSG00000052146	Rps10	0.296548	0.000339838	U	Y
ENSMUSG00000003429	Rps11	0.339961	0.000335871	U	Y
ENSMUSG00000061983	Rps12	0.275343	0.0106645	U	Y
ENSMUSG00000090862	Rps13	0.3137	3.30557e-05	U	Y
ENSMUSG00000024608	Rps14	0.452265	4.54768e-07	U	Y
ENSMUSG00000063457	Rps15	0.37273	2.81874e-06	U	Y
ENSMUSG00000008683	Rps15a	0.46511	2.09854e-10	U	Y
ENSMUSG00000037563	Rps16	0.277676	0.000862854	U	Y
ENSMUSG00000060419	Rps16-ps2	0.290919	0.000844615	U	Y
ENSMUSG00000008668	Rps18	0.424474	1.84352e-07	U	Y
ENSMUSG00000040952	Rps19	0.355342	0.000472372	U	Y
ENSMUSG00000039001	Rps21	0.292357	0.00316388	U	Y
ENSMUSG00000049517	Rps23	0.38725	1.11382e-06	U	Y
ENSMUSG00000100755	Rps23-ps1	0.52914	1.89684e-09	U	Y
ENSMUSG00000025290	Rps24	0.549068	6.66089e-12	U	Y
ENSMUSG00000009927	Rps25	0.232465	0.0210413	U	Y
ENSMUSG00000090733	Rps27	0.580337	1.2847e-09	U	Y
ENSMUSG00000020460	Rps27a	0.36936	0.000145529	U	Y
ENSMUSG00000036781	Rps27l	-0.340518	0.016189	D	Y
ENSMUSG00000050621	Rps27rt	0.509886	0.0400782	U	Y
ENSMUSG00000067288	Rps28	0.370682	6.19331e-05	U	Y
ENSMUSG00000030744	Rps3	0.357762	3.85615e-05	U	Y
ENSMUSG00000028081	Rps3a1	0.336602	6.84085e-05	U	Y
ENSMUSG00000031320	Rps4x	0.302236	0.00108177	U	Y
ENSMUSG00000012848	Rps5	0.394457	9.6824e-06	U	Y
ENSMUSG00000028495	Rps6	0.351442	1.93386e-05	U	Y
ENSMUSG00000003644	Rps6ka1	-0.30121	0.00818916	D	Y
ENSMUSG00000089872	Rps6kc1	0.519082	0.0207602	U	Y
ENSMUSG00000061477	Rps7	0.416943	1.63918e-07	U	Y
ENSMUSG00000047675	Rps8	0.31429	0.00414828	U	Y
ENSMUSG00000006333	Rps9	0.366363	2.11538e-05	U	Y
ENSMUSG00000032518	Rpsa	0.336983	2.02487e-05	U	Y
